# Supplementary material for: Feminizing Wolbachia endosymbiont disrupts maternal sex chromosome inheritance in a butterfly species
Source: PubMed Central journal article supplement (PMC6121850; doi:10.1002/evl3.28), 2017-10-31

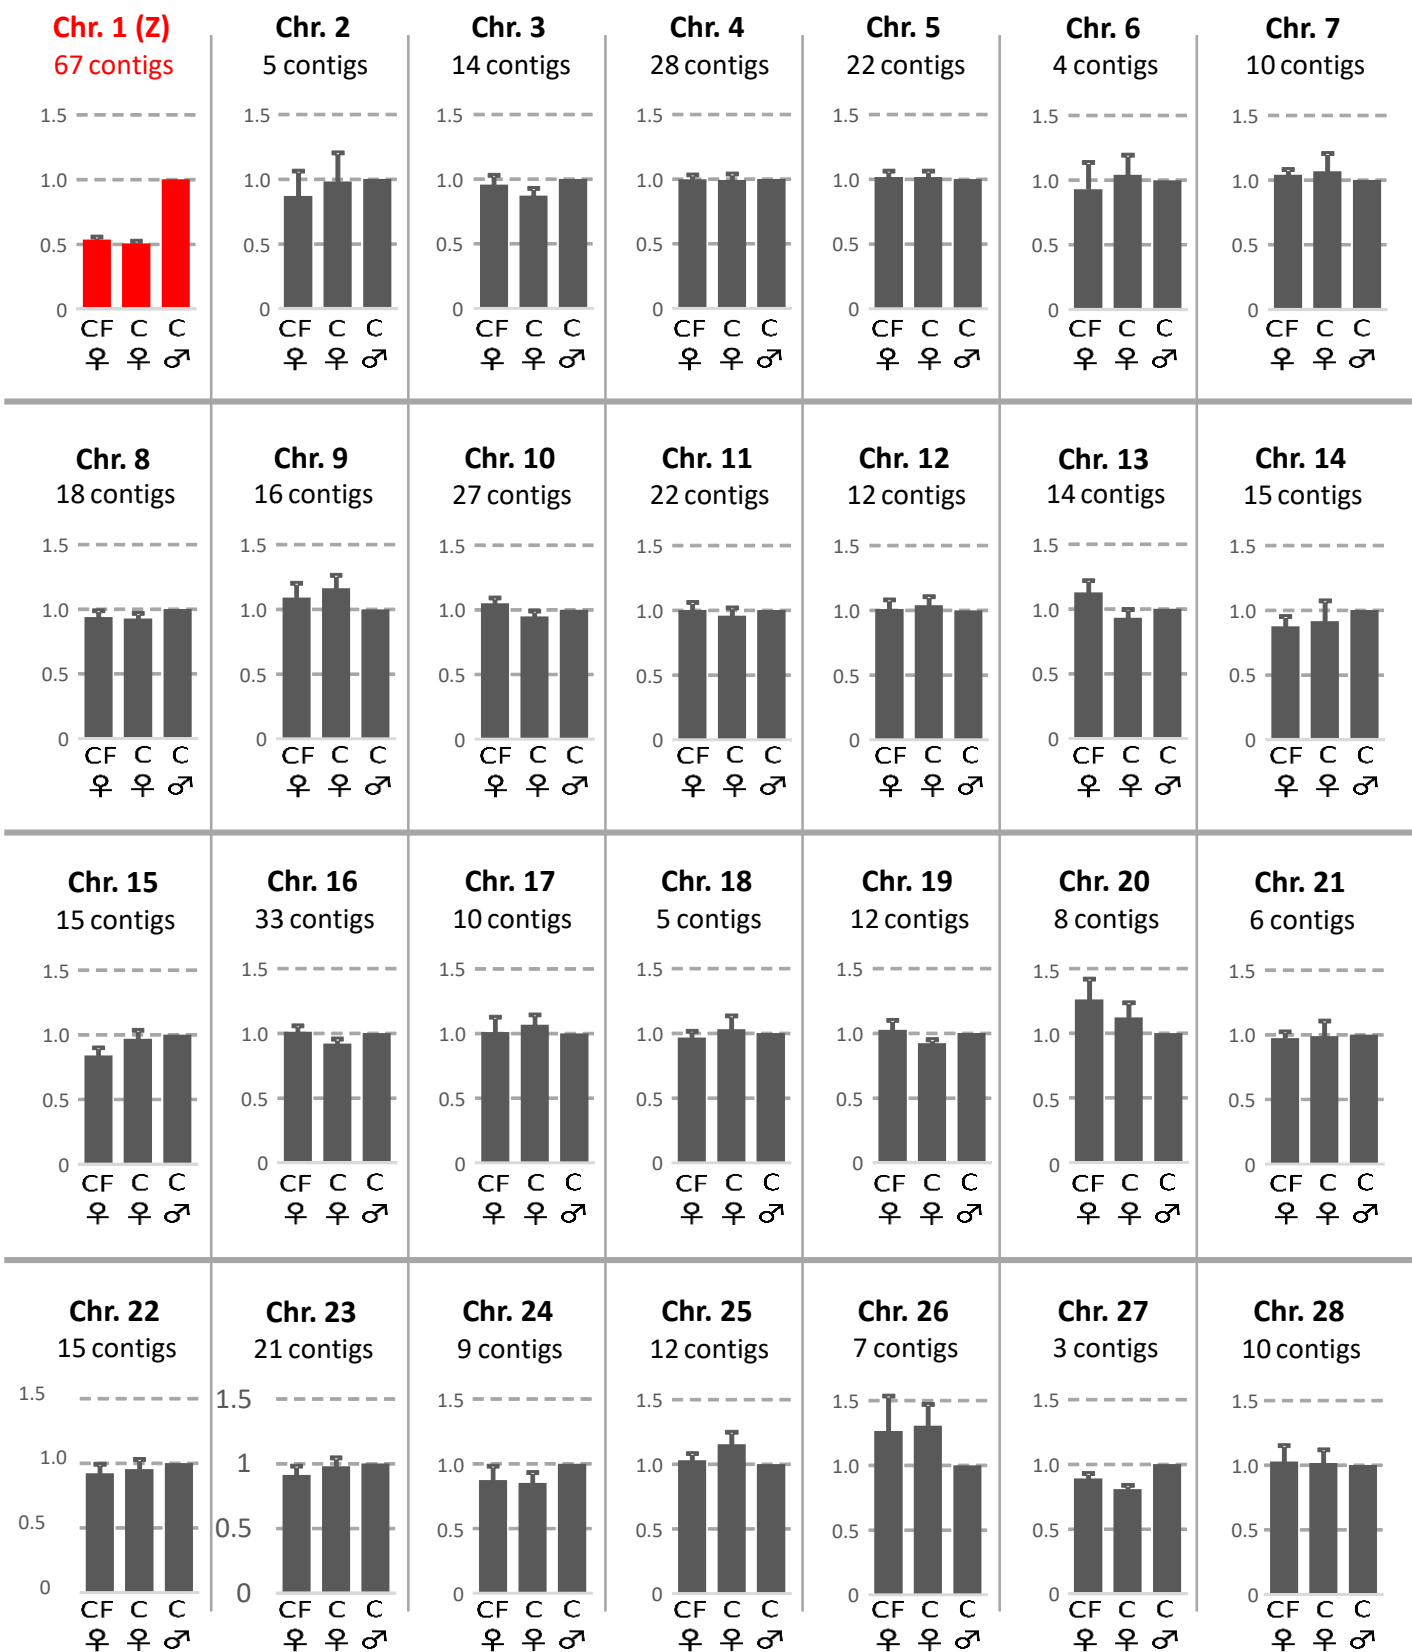

Supplement: EVL3-1-232-s002.pdf [file EVL3-1-232-s002.pdf]
