# Supplementary material for: Feminizing Wolbachia endosymbiont disrupts maternal sex chromosome inheritance in a butterfly species
Source: PubMed Central journal article supplement (PMC6121850; doi:10.1002/evl3.28), 2017-10-31

## A Sequence polymorphism of Z-linked *Tpi* gene

| Genotype of Z chromosome | Polymorphic sites |     |     |     |     |     |     |     |     |     |     |     |     |     |
|--------------------------|-------------------|-----|-----|-----|-----|-----|-----|-----|-----|-----|-----|-----|-----|-----|
|                          | 109               | 110 | 111 | 112 | 135 | 157 | 160 | 173 | 175 | 228 | 233 | 324 | 403 | 425 |
| Z <sup>A</sup>           | A                 | T   | G   | G   | A   | A   | T   | C   | T   | T   | T   | T   | C   | G   |
| Z <sup>B</sup>           | –                 | –   | –   | –   | A   | A   | C   | T   | T   | A   | T   | –   | T   | G   |
| Z <sup>C</sup>           | A                 | T   | G   | G   | G   | A   | T   | C   | T   | T   | T   | T   | T   | G   |
| Z <sup>D</sup>           | A                 | T   | G   | G   | A   | G   | C   | T   | A   | T   | G   | T   | T   | A   |

## B Examples of genotyping of sex chromosomes based on sequence data

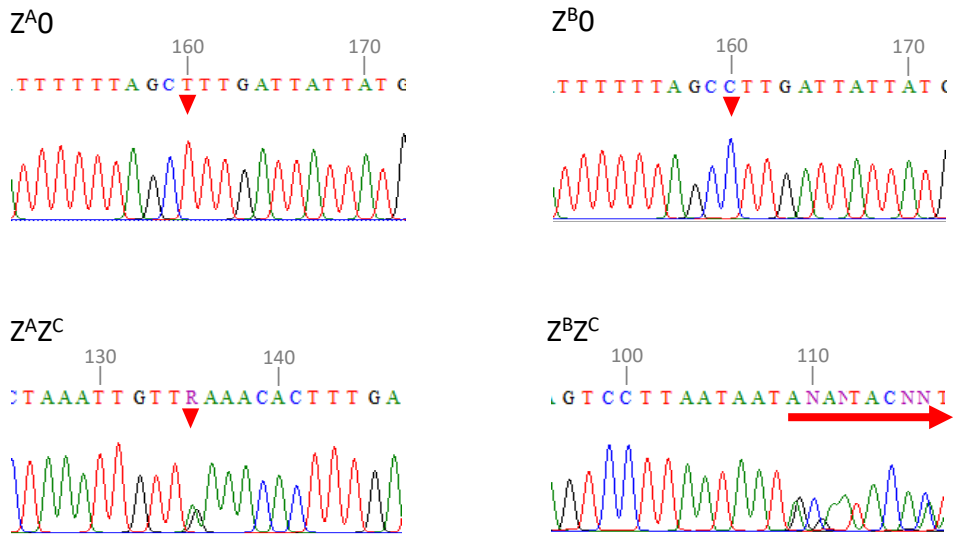

Supplement: EVL3-1-232-s004.pdf [file EVL3-1-232-s004.pdf]
